# Supplementary material for: Oriented attachment induced morphology modulation of ZnO nanoparticles at low temperature using KOH as a morphology controller
Source: Royal Society of Chemistry journal article supplement (doi:10.1039/d1nj02248b), 2021-01-01
Supplement: d1nj02248b1.pdf [file d1nj02248b1.pdf]

## Supplementary Material for

### **Oriented attachment induced morphology modulation of ZnO nanoparticles at low temperature using KOH as a morphology controller**

Sumit Mukherjee<sup>a, #</sup>, Subhamay Pramanik<sup>a</sup>, Sandip Das<sup>a</sup>, Subhabrata Chakraborty<sup>b</sup>,  
Shyamal Mondal<sup>c, d</sup>, Tatan Ghosh<sup>a, f</sup>, Rajib Nath<sup>a</sup>, Probodh K. Kuiri<sup>a, \*</sup>

<sup>a</sup>Department of Physics, Sidho-Kanho-Birsha University, Ranchi Road, Purulia, 723104, West Bengal, India

<sup>b</sup>Indian Institute of Engineering Science and Technology, Howrah, 711103, West Bengal, India

<sup>c</sup>Saha Institute of Nuclear Physics, 1/AF Bidhannagar, Kolkata 700064, India

<sup>d</sup>Fondazione Bruno Kessler, Center for Materials and Microsystems-Micro Nano Facility, Via Sommarive 18, 38123 Trento, Italy

<sup>f</sup>Department of Physics, Balarampur College, P.O - Rangadih, Purulia, 723143, West Bengal, India

Journal: New Journal of Chemistry

Figure s1 shows the XRD spectrum of the KOH pellet used for the synthesis of ZnO nanoparticles including nanorods. The XRD measurement was carried out using the same machine used for the measurements of the XRD of the ZnO samples. The XRD peaks in the figure correspond to the different crystalline planes of the KOH. However, one can see none of the XRD peak matches exactly with the XRD peaks of the ZnO samples given in the manuscript.

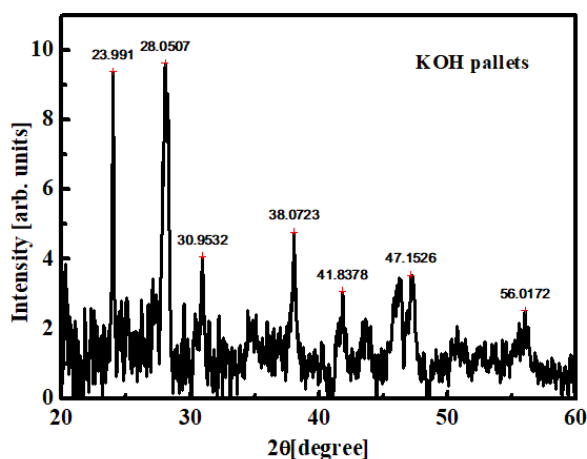

Figure s1: XRD spectrum of the KOH pellet.

Figure s2 shows the scanning electron microscopy (SEM) image of a KOH pellet. The SEM measurement was carried out using Zeiss SEM (model EVO 18'). Prior to the SEM measurements, the KOH pellet was coated using Pt (~2-3 nm) to make it conducting to avoid accumulation of electrons during SEM measurements. The surface of the KOH appears to be nearly smooth with some bumps.

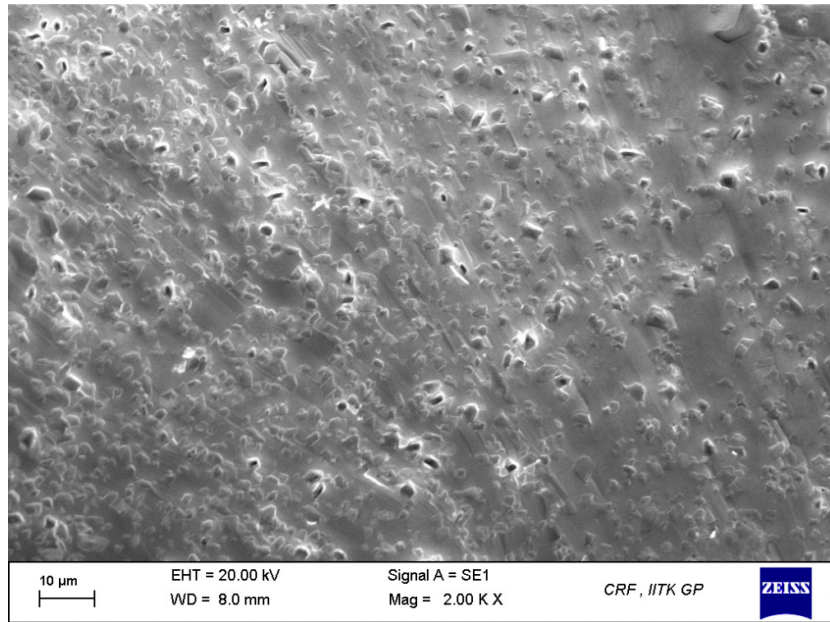

Figure s2. SEM image of KOH pellet.

Figure s3 shows the energy dispersive X-ray (EDX) spectrum of the KOH pellet using the Oxford EDX attached with the SEM machine. No other peak than K and O are seen in the EDX spectrum. Detection of H is not possible in this technique and hence H is not seen in the EDX data. EDS has been performed with EDS

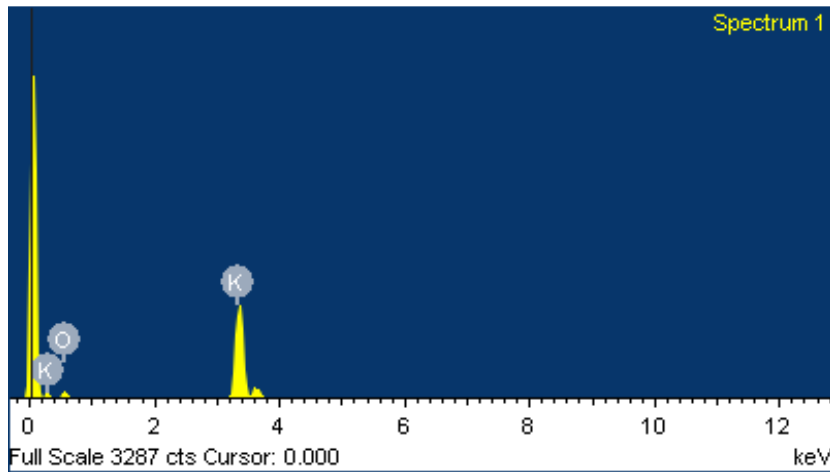

Figure s3. EDX spectrum of KOH pellet.

Table s1: Weight and atomic percentages of K and O estimated from the EDX spectrum of KOH.

| Element | Weight % | Atomic % |
|---------|----------|----------|
| O K     | 34.85    | 56.66    |
| K K     | 65.15    | 43.34    |
| Totals  | 100.00   |          |
